# 1 **How does mixed reality affect quiet stance?**

2 Gaiqing Kong<sup>1,2,4,5</sup>, Kunlin Wei<sup>1,2,3</sup> and Konrad P. Kording<sup>4,5</sup>

3

4 <sup>1</sup>School of Psychological and Cognitive Sciences, Peking University, Beijing, China

5 <sup>2</sup>Beijing Key Laboratory of Behavior and Mental Health,

6 <sup>3</sup>Peking-Tsinghua Center for Life Sciences

7 <sup>4</sup>Shirley Ryan AbilityLab, Chicago, IL, USA

8 <sup>5</sup>Northwestern University, Chicago, IL, USA

9

10 Correspondence should be addressed to K.P.K ([koerding@gmail.com](mailto:koerding@gmail.com))

11 Konrad P. Kording, Shirley Ryan AbilityLab (Rehabilitation Institute of Chicago),

12 Northwestern University, Chicago, IL, USA

13

14

15

16

17

18

19

20

21

22

23

24

25

26

27

28

29

30

31

32

33

34 **Abstract**

35 Mixed reality (MR) has promise for learning, design, and entertainment, and for use during  
36 everyday life. However, when interacting with objects in mixed reality, will moving objects make  
37 us fall or perturb our postural stability? To address this question, we recruited participants,  
38 instructed them to stand quietly, and measured how much virtual objects presented in mixed  
39 reality (Microsoft HoloLens) affected their stance. We analyzed the effects of solid object and text,  
40 in both a static and a dynamic setting. Mixed reality events induced some movements, but the  
41 effect, while significant, was exceptionally small ( $< 1\text{mm}$  &  $< 0.5^\circ$  perturbations in terms of mean  
42 distance and angle rotations). We conclude that induced movement in “real reality” should not be  
43 too much of a concern when designing mixed reality applications.

44

45

46

47

48

49

50

51

52

53

54

55

56

57 **Introduction:**

58 Mixed reality promises to improve our interactions with both real and artificial worlds by allowing  
59 the two to mix. For example, the senior author on this paper would love a system that can project  
60 the name over the head of every person he meets. While mixed reality has the potential to improve  
61 education, entertainment, and communication, it requires users to wear a head mounted display  
62 (HMD, e.g. Microsoft Hololens) for displaying virtual objects. For safety reason, it is important to  
63 study how this technology affects user's posture and balance. However, the effects of mixed  
64 reality using HMD on postural stability and balance is not well understood.

65

66 Virtual reality is known to have an influence on posture. Various studies have looked at the effect  
67 of virtual reality (VR) on postural stability [1-9]. Earlier studies found that sensory inputs from  
68 visual system conflicted with that from vestibular and somatosensory systems induced by VR  
69 caused more postural instability [2, 9]. VR also influences body sway and instability [4],  
70 producing increased postural sway that is comparable to those observed with closed eyes [1] .  
71 Besides its effect on static stance, VR also affects dynamic postural balance [6]. Previous studies  
72 have found that displacement of center of pressure or angular deviations of shoulder caused by VR  
73 amount to a few centimeters or degrees [1, 6, 9]. One report even documented that standing  
74 participants sometimes had to take an extra step to prevent falling when facing with sudden  
75 perturbation in VR [7]. These findings in VR settings thus suggest that it is important to quantify  
76 the effect of mixed reality on postural stability.

77

78 Posture control is complex as the nervous system needs to deal with the information from the body,  
79 e.g. vestibulospinal system, proprioception, visual information, as well as information from the  
80 environment, e.g. the stability of support and the field of view [10, 11] . Studies on postural  
81 stability measurement include ground reaction force [4-6], head movements [7], and upper body  
82 movements [1]. However, all measured variables tend to correlate heavily. For instance, the  
83 movements of head and upper body directly influence the ground reaction force, though their  
84 relationship is not well documented. Here we use head movement only to examine the postural  
85 stability in mixed reality.

86

87 There are multiple reasons why we may expect an influence of mixed reality on quiet stance.

88 Mixed reality involves stereoscopic visual stimuli that move in the visual field in predictable or  
89 unpredictable way. On the other hand, quiet stance is continuously modulated by visual  
90 information [10, 12-16]. Furthermore, a sudden appearance of a visual stimulus may elicit a startle  
91 effect [17-19] which could lead to quick postural adjustments, including avoidance behaviors [18].  
92 Lastly, a virtual object may affect the visibility of real objects in the external world which  
93 typically serve as important reference for maintaining postural stability; this reduction in visibility  
94 might affect quiet stance as a result [20]. As such, we expect mixed reality to affect real world  
95 stance though estimation of its effect is still lacking.

96

97 Here we investigate how static and dynamic objects and text presented in mixed reality affect head  
98 movement using visual stimuli generated with the Microsoft HoloLens. We recruited human  
99 participants, instructed them to stand quietly and measured the movements of their head using the  
100 built-in motion tracking system of the HoloLens. We find extremely small effects of our visual  
101 perturbations.

102

## 103 **Method**

104

### 105 *Participants*

106

107 We recruited a total of 22 participants (8 females and 14 males, age:  $30.1 \pm 7.5$ , average  $\pm$ SD). All  
108 participants were right-handed, had normal or corrected-to-normal vision without known history  
109 of psychiatric or neurological disorders. All participants gave informed consent according to the  
110 guidelines of the Institutional Review Board of Northwestern University Medical School to  
111 participate in this study.

112

### 113 *Mixed reality environment*

114

115 Participants stood in the experimental room and wore a  
116 head-mounted display (HMD, Microsoft HoloLens, Fig.1).  
117 The HoloLens was equipped with a pair of mixed reality  
118 smartglasses. It ran on the Windows Holographic platform  
119 under the Windows 10 operating system. HoloLens features  
120 an energy-efficient depth camera with a  $120 \times 120^\circ$  angle of  
121 view. The ambient lighting condition in the experimental  
122 room is not too dark and not too bright. The calibration  
123 process was performed every day. During the calibration

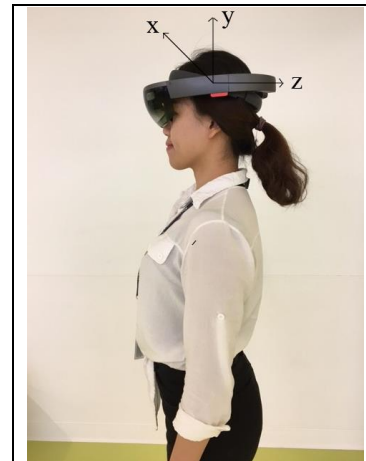

Fig.1 One of the authors testing the study set-up

124 process, the experimenter was asked to align their finger with a series of six targets per eye. It  
125 allows the device to adjust hologram display according to the user's interpupillary distance. The  
126 visualizations were first developed in the unity platform (Unity 5.5.0f3 Personal), then we  
127 exported the project from Unity to Visual Studio (Microsoft Visual Studio 2015), then built and  
128 deployed to the HoloLens. For all the settings, including developing scene in Unity, compiling to  
129 Visual Studio, and deploying to HoloLens, please refer  
130 [https://developer.microsoft.com/en-us/windows/mixed-reality/holograms\\_100](https://developer.microsoft.com/en-us/windows/mixed-reality/holograms_100). The 'Near Clip  
131 Plane' of 'Main Camera' in our experiment is 0.3. The experimental data was sent to a local sever,  
132 and the data analysis was conducted offline by customized Matlab programs (2012b, Mathworks,  
133 Natick, MA).

134

### 135 *Study design*

136

137 In this experiment, participants were asked to stand comfortably and naturally with the feet  
138 parallel and shoulder-width apart and with their arms on their sides. Participants wore the  
139 HoloLens and were asked to maintain an upright standing position, remain as stable as possible for  
140 the duration of each trial. To obtain identical postural configurations between trials, markings were  
141 placed on the ground to guide the placement of the feet of each participant.

142

143 During quiet stance, participants viewed four possible visual events, one at a time. These events  
144 involved solid object or text, either presented in a static or dynamic setting (Fig. 2). Thus, the

145 experiment had a 2 (object, text) × 2 (static, dynamic) design. The static object was a basketball  
146 with a diameter of ~0.4m appearing 2 meters in front of participants; The dynamic object was the  
147 identical basketball moving as 1.8 m/s from 2 meters away toward participants' face and stopping  
148 at 0.2 meters away; The static text was one sentence written as "What does a neuroscientist order  
149 at a bar? A spiked drink", the dynamic text was the same sentence moving as 0.8 m/s from 0.4  
150 meters above to -0.4 meters below and 2 meters in front of participants. For the dynamic settings,  
151 the basketball moved in the depth direction towards the participant and the text moved in the  
152 vertical direction from high to low. Participants can see all the visual events without moving their  
153 heads. In addition, we set a blank screen between every two trials as a baseline condition. The  
154 blank screen and the background of the other four visual events in the Hololens are transparent, so  
155 what we presented can be mixed with reality. The experiment included 120 trials with each visual  
156 event being repeated 30 times. The trials were presented in random order. Before these formal  
157 trials, participants practiced for 4 trials where each visual event was randomly present once. Each  
158 trial lasted one second, the inter-trial interval was also one second, and the experiment lasted  
159 approximately somewhat longer than four minutes. The sampling rate was 40 Hz.

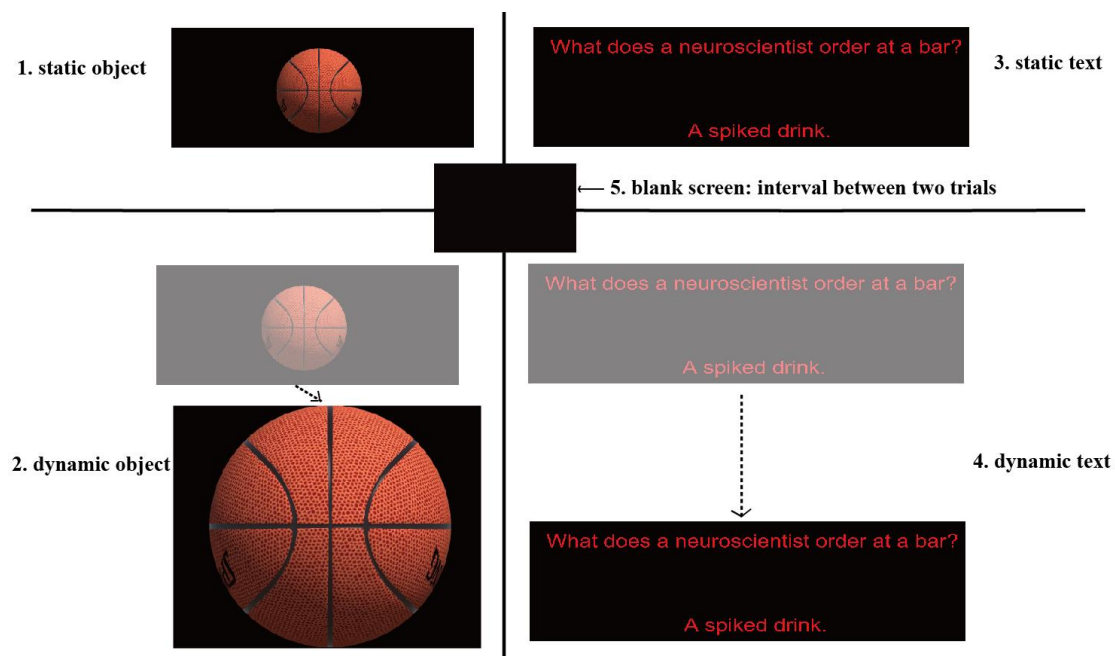

160

161 **Fig. 2. Visual events presented in the Hololens.**

162 During quiet stance, participants saw one of four visual objects: solid object (basketball) and text,  
163 either present in a static or a dynamic setting. For the dynamic setting, a basketball moved in the  
164 depth direction towards the participant and the text moved in the vertical direction from high to  
165 low.

166

167 *Data analysis*

168

169 Head sway was measured using the HoloLens system which continuously recorded head position  
170 in  $x$ ,  $y$ , and  $z$  direction and the corresponding rotation angles (see Fig. 1). We separately analyzed  
171 the effects of solid object and text for the static and the dynamic settings. Each trial was  
172 normalized by subtracting the beginning state from position and angle variables. We calculated the  
173 mean head movements, standard deviation within trials and Root mean square (RMS) values  
174 across trials. One-way ANOVAs were performed for each variable. When appropriate, post-hoc  
175 comparisons were made between conditions with Bonferroni correction. All statistical analyses  
176 were executed using SPSS statistical package (IBM, SPSS 20.0). The significance level was set at  
177  $\alpha = 0.05$ .

178

179 *Code Availability:*

180

181 We used a set of scripts to control actions of visual events, collect data and send raw data from  
182 client to server. All the scripts are made available online at  
183 <https://github.com/KordingLab/mixed-reality/tree/master>. We hope that this code-based will  
184 support other scientists and simplify their work with HoloLens.

185

186 **Results**

187

188 To ask how mixed reality affects quiet stance, we recruited 22 healthy participants and instructed  
189 them to stand quietly while presenting stimuli in mixed reality (Microsoft HoloLens). We measured  
190 the head movements using the built-in tracking mechanism of the HoloLens (see Fig.1). We  
191 presented two classes of stimuli, solid objects vs text, in two different scenarios, static vs dynamic.  
192 Averaging across trials allowed us to quantify the effect of mixed reality stimulation onto quiet  
193 stance.

194

195 As we rely on the measurements from HoloLens, we need to calibrate the HoloLens to ensure that  
196 it's measurements are meaningful and of high quality. We tested 4 positions every 30 centimeters  
197 in  $z$  direction which we measured using a good old-fashioned ruler. We found a linear relationship

198 between the display measured by Hololens and the actual distance ( $r = 1.0$ ,  $p < 0.00001$ ), the  
199 regression slope is 1 (Fig. 3). We conclude that the measurements by the Hololens camera are  
200 reasonably precise.

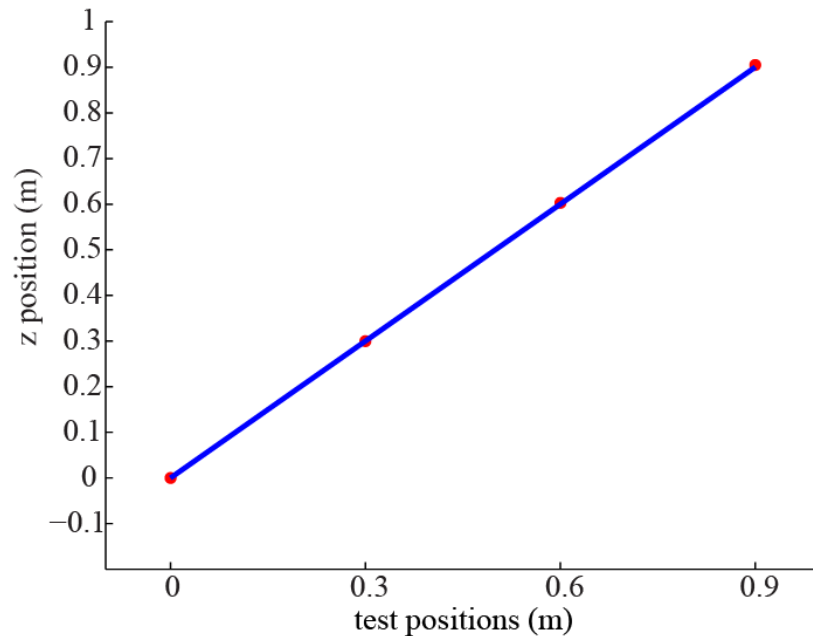

201 **Fig. 3. Comparing the actual distance and the display of participant while using Hololens.**  
202 Four positions every 30 centimeters were tested in z direction. The changes measured by Hololens  
203 were very close to the actual distance ( $r = 1.0$ ), the regression slope is 1. Deviations are probably  
204 mostly, due to our inability to precisely position the Hololens by hand for this calibration.  
205

206  
207 We first want to know if the perturbation induces a meaningful change in the raw position data. To  
208 do so we looked at individual trials and looked for movement following the stimulation (Fig. 4).  
209 We chose one of the participants and plotted the 10<sup>th</sup> trial of each kind of visual events. In the  
210 single trials that we looked at by eye, there is some ongoing shifts of the body related to the  
211 stimulation. An effect may exist, but anecdotally it seems to be very small.

212



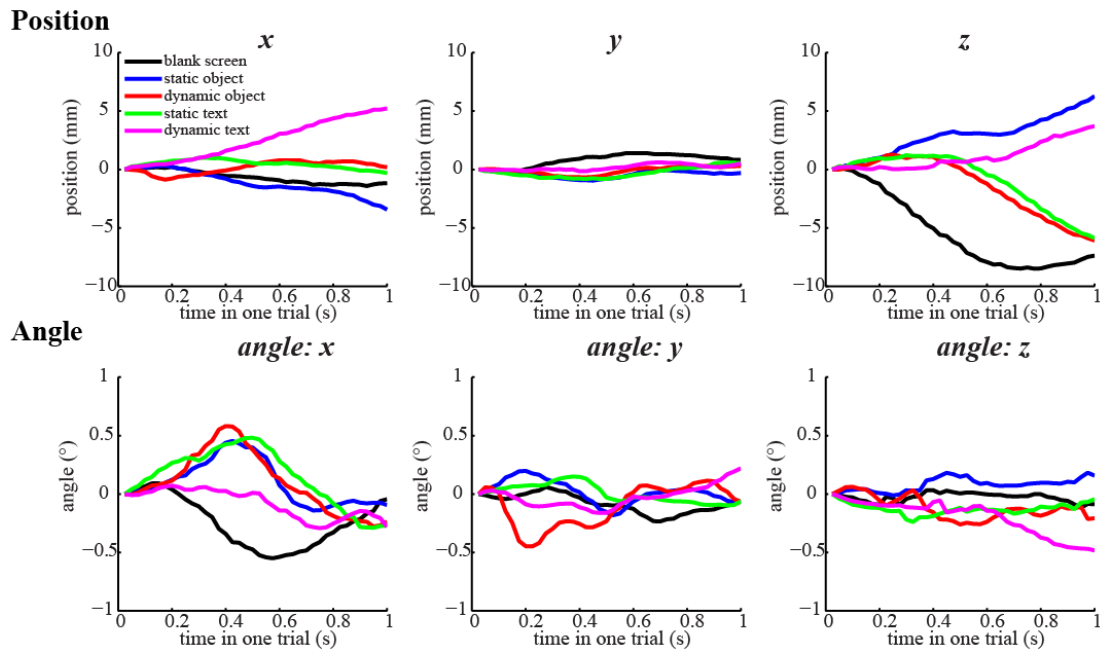

213

214 **Fig. 4. Head movements of single trials during five different visual events – individual**  
215 **participant.**

216 Five different visual events were presented to each participant. Position (first row) and angle  
217 rotations (second row) were measured and shown one participant. Notice that if angle > 0  
218 participant rotates his/her head counterclockwise around axis (from origin to the axis' positive  
219 direction).

220

221 To be able to quantify these small effects we can average across all trials of the same kind. Indeed,  
222 when looking at a single participant there seems to be a slight, average influence of the stimulation  
223 onto the head movement (Fig. 5). However, the effects are so small or inconsistent that even  
224 compiling all data from a single participant we are poorly powered to see the effect.

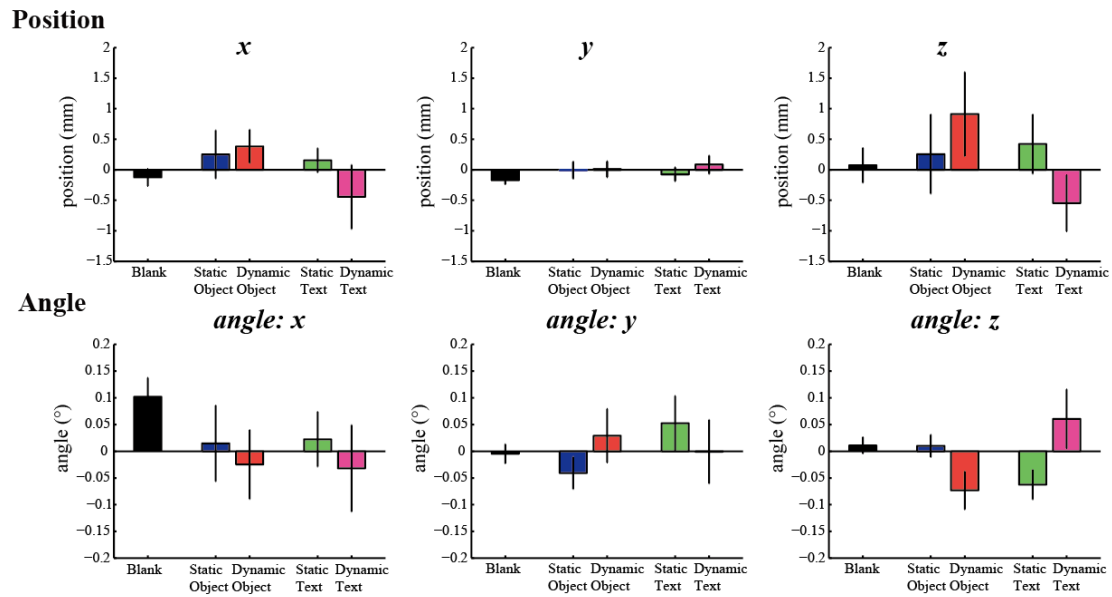

225

226 **Fig. 5. The average distance and angle rotation of head movements across trials from a**  
227 **typical participant.**

228 The mean distance (first row) and angle rotations (second row) are shown for five different visual  
229 events. Each kind of visual event was randomly presented 30 times. Vertical bars on the columns  
230 depict standard error of the mean across trials. Notice that if angle > 0 participant rotates his/her  
231 head counterclockwise around the axis (from origin to the axis' positive direction).

232

233 To fully use our statistical power, we can average the data across all participants. Clearly there is  
234 an effect in most conditions but it also clearly is extremely small (Fig. 6). The difference between  
235 static and dynamic visual events is inconspicuous. It seems that there is an adaptation phase during  
236 the first few trials for each kind of visual events but that behavior stabilizes rapidly. All mean  
237 perturbations of stance are less than 1cm and 0.5°, even the first ones. But most importantly,  
238 anything we see is so small that it is practically irrelevant.

239

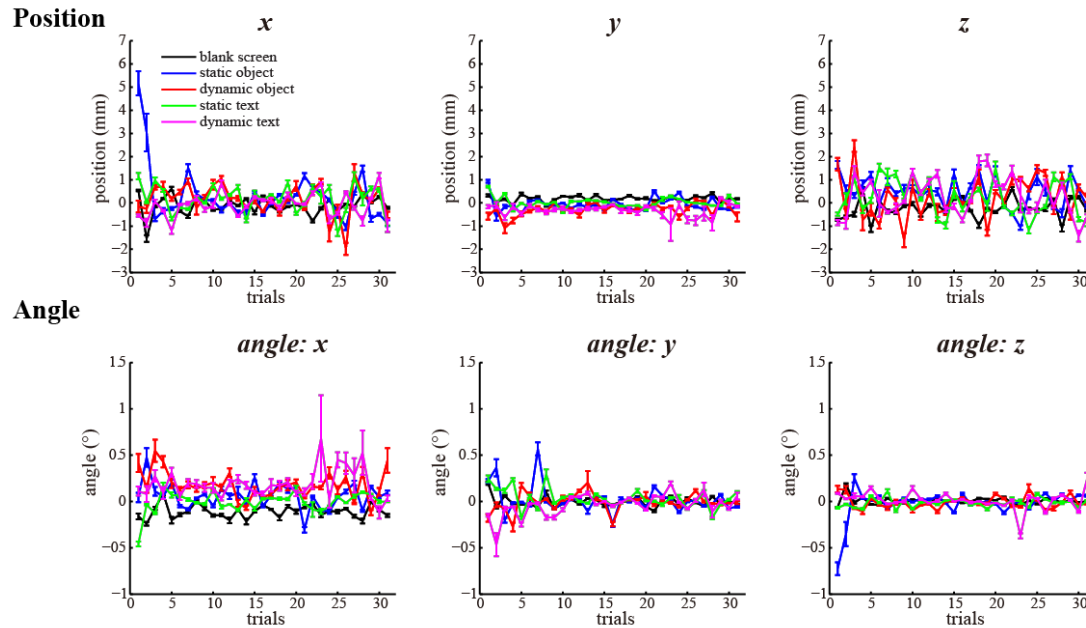

240

241

242 **Fig. 6. Head movements was plotted as a time of whole experiment - all participants.**

243 Head sway traces were shown during the whole experiment including the first practice trial. The  
244 mean distance (first row) and angle rotations (second row) were shown for five different visual  
245 events. Vertical bars on the columns depict standard error of the mean. Notice that if angle > 0  
246 participant rotates his/her head counterclockwise around axis (from origin to the axis' positive  
247 direction).

248

249 We want to quantitatively describe the effect sizes of perturbations. The mean effect was  
250 exceptionally small (< 1mm & < 0.5° perturbations, Fig. 7). We analyze the data using one-way  
251 ANOVAs with repeated measures for each camera measurement (x, y, z, angle x, angle y, angle z)  
252 across the five events (blank screen, static object, dynamic object, static text, dynamic text). A few  
253 significant differences emerged in these results. For distance y, there were significant differences  
254 among different visual events ( $F_{(4, 105)} = 3.63, p = 0.008$ ). The post hoc tests found participant  
255 bend the head more forward in both dynamic object and dynamic text conditions compared to the  
256 blank screen condition ( $p = 0.025$  and  $p = 0.021$ , respectively). For angle x, the differences of  
257 visual events were significant ( $F_{(4, 105)} = 3.54, p = 0.009$ ). The post hoc test showed dynamic  
258 object induced more head down than that the blank screen ( $p = 0.01$ ). The mean effect, while  
259 significant, was very small.

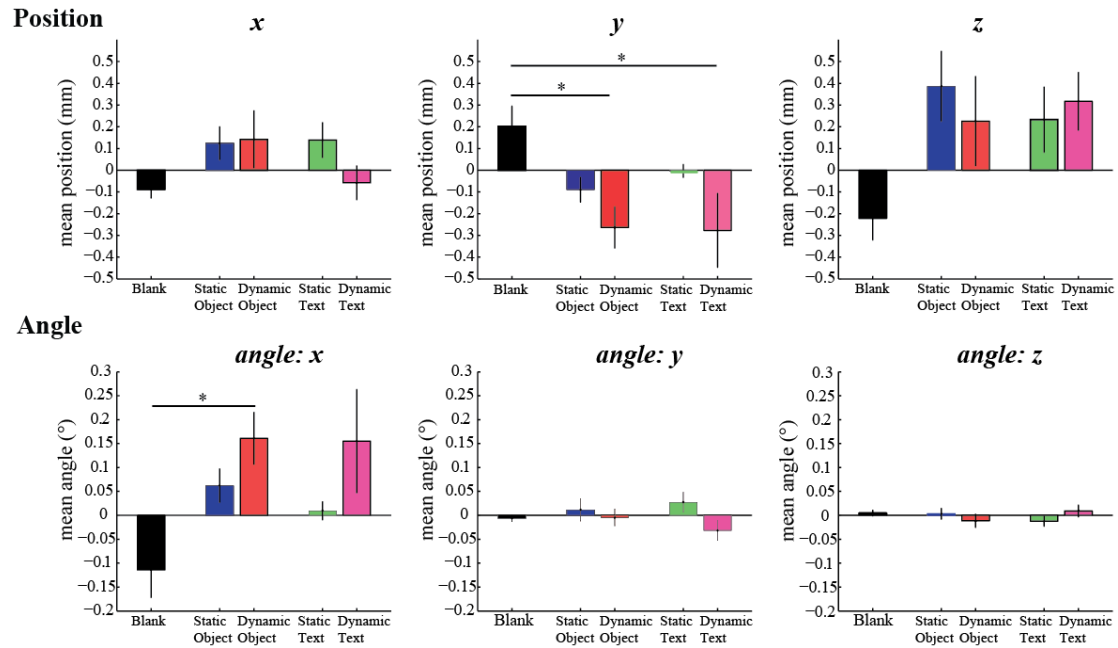

260

261 **Fig. 7. The average distance and angle rotation of head movements– all participants.**

262 The distance (first row) and angle rotations (second row) are shown for five different visual events  
 263 separately. Note that if angle > 0 participant rotates his/her head counterclockwise around axis  
 264 (from origin to the axis' positive direction). Vertical bars on the columns depict standard error of  
 265 the mean. Post hoc differences are marked with \* ( $p < 0.05$ ).

266

267 The mixed reality environment could affect the variability of head movements within each trial.

268 We calculated the standard deviation (relative to the trial mean) for each trial (Fig. 8). No

269 significant difference was observed by one-way ANOVAs among all comparisons. On the whole,

270 the variability of head movement is marginally affected by the stimuli in mixed reality.

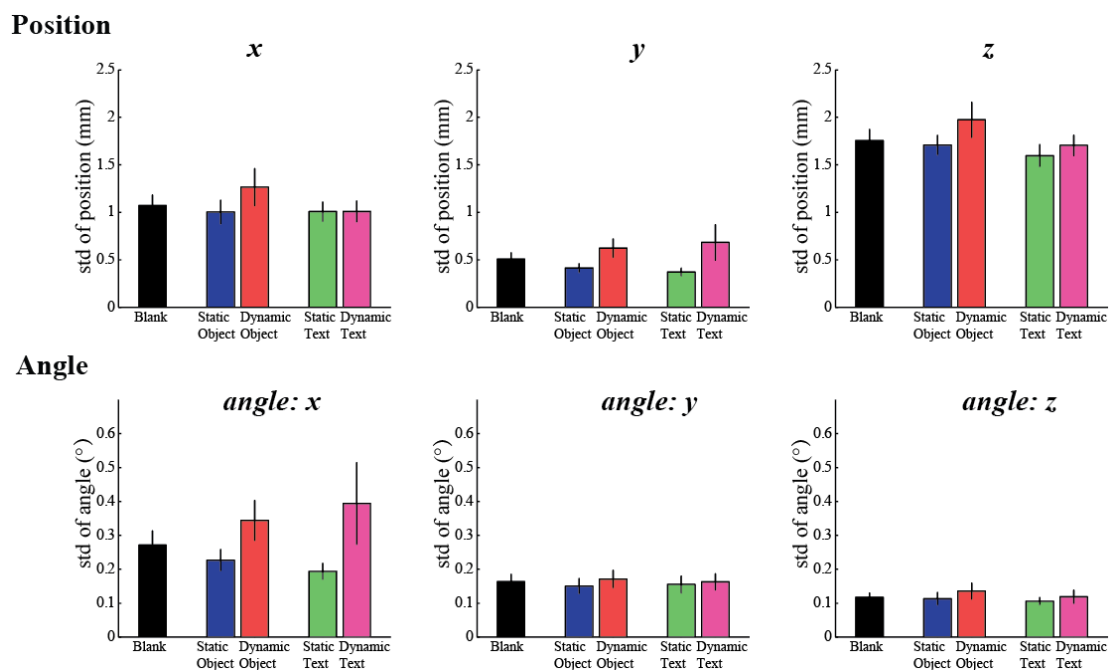

271

272 **Fig. 8. The standard deviation of head movements within each trial – all participants.**

273 We calculated the mean head standard deviation for each trial of the same kind visual event. The  
 274 mean standard deviation of distance (first row) and that of angle rotations (second row) were  
 275 shown for five different visual events. Vertical bars on the columns depict standard error of the  
 276 mean of standard deviation.

277

278 The mixed reality environment could alternatively affect the variability of head movements across  
 279 trials. We thus calculated the standard deviation of Root mean square (RMS), across all trials of  
 280 the same kind visual event (Fig. 9). The standard deviation of RMS values showed that the effect  
 281 of conditions on head stability was small ( $< 2.5\text{mm}$  &  $< 1^\circ$ ). Static conditions tend to have larger  
 282 variability as compared to dynamic conditions; but this effect is too weak to yield any significant  
 283 results. The one-way ANOVAs showed no significant differences for the six measurements. Again,  
 284 the variability of head movement is only marginally affected by visual stimuli presented in the  
 285 mixed reality.

286

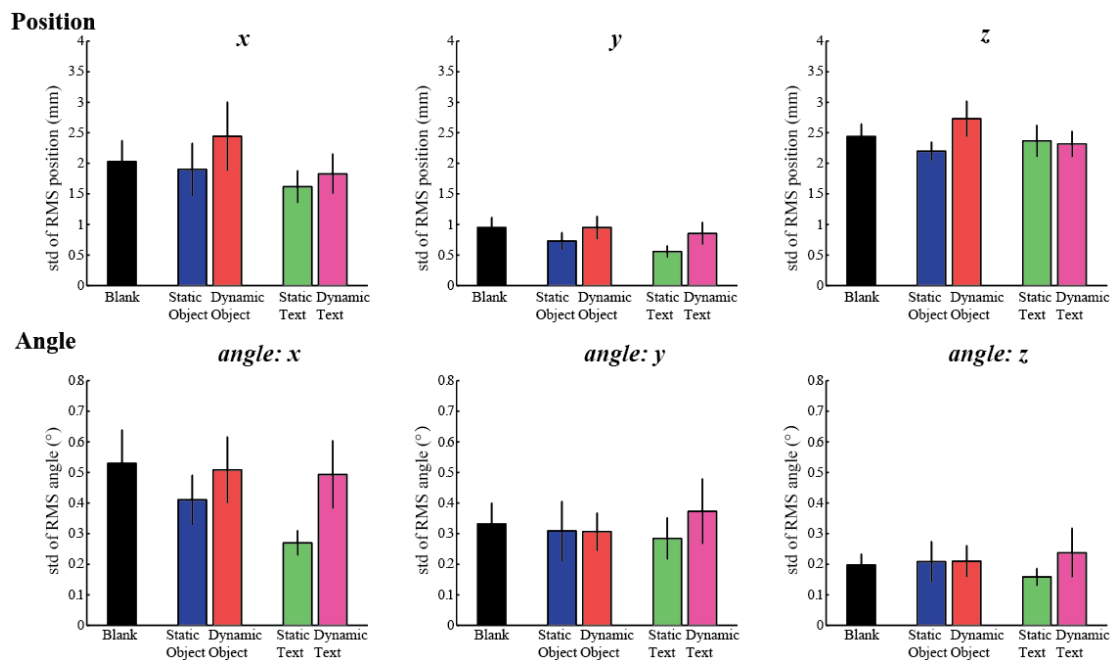

287

288 **Fig. 9. The standard deviation of mean RMS across trials– all participants.**

289 The standard deviation of RMS values across trials of distance (first row) and that of angle  
 290 rotations (second row) are shown for five different visual events. Vertical bars on the columns  
 291 depict standard error of the mean of standard deviation.

292

293 **Discussion**

294

295 We analyzed the effects of solid object and text presented in Hololens, in both a static and a  
 296 dynamic setting. The visual stimuli induced some movement, but the effect shown by the mean

297 and variance of head sway, while some significant, was exceptionally small ( $< 1\text{mm}$  &  $< 0.5^\circ$   
298 perturbations). The standard deviation of RMS values also showed that the variability on head  
299 sway was small ( $< 2.5\text{mm}$  &  $< 1^\circ$ ). The small effects on the presentations become tiny after a few  
300 presentations, participants adapted out the effect of mixed reality. Mixed reality does not seem  
301 likely to literally knock you off your feet.

302

303 We did not investigate a huge range of conditions, just four types of visual events. The duration of  
304 the mixed exposure is short in this experiment ( $< 5$  minutes), and each trial lasting 1s is also short,  
305 but the duration is enough to show the effect of mixed reality environment. In addition, we did not  
306 track the whole body movements, just head movements. One study showed that head movements  
307 is stable and reliable as a measure of posture stability[8]. Few studies measured the linear and  
308 angular displacements of the head and shoulders simultaneously. However, it hard to move upper  
309 body without head movements. We thus think our findings based on head movement can be  
310 generalized to other postural stability measures.

311

312 The effect of visual events in mixed reality was exceptionally small. One possible reason is that  
313 participants still have the peripheral visual inputs which can result in postural compensations [21].  
314 Another possible reason is that mixed reality is different from virtual reality, which completely  
315 isolates people from visual reality; this partial connection to reality might help maintain stability.  
316 Although we presented dynamic object and text in our experiment, they were simple, repeated  
317 visual events; people may adapt to them rapidly across trials. Viewed from this angle, it's still an  
318 open question how much the mixed reality affects people's quiet stance if we change the visual  
319 events to more dramatic ones, for example, making dynamic objects moving faster or appearing  
320 from random positions.

321

322 We have studied movement behavior while wearing the HoloLens. Mixed reality promises to be  
323 useful across a broad range of experimental situations. To make it easy for scientists to build on  
324 our efforts, we make all our code available online  
325 (<https://github.com/KordingLab/mixed-reality/tree/master>). We hope that this code-base will be  
326 useful for movement scientists, psychologists, engineers or practitioners from clinic backgrounds.

327 After all, mixed reality allows presenting visual stimulus to the participant more flexibly than  
328 traditional approaches such as using computer monitors or projection screen. This opens the  
329 window for a broad range of experimental manipulations and more realistic visual presentations,  
330 and it also promises to help scientists investigate more relevant applications to real world  
331 questions. We hope our study here serves as an initial endeavor in this direction.

332

### 333 **Acknowledgments**

334 This study was partially supported by National Institutes of Health (NIH 2R01NS063399). The  
335 funders had no role in study design, data collection and analysis, decision to publish, or  
336 preparation of the manuscript.

337

338

### 339 **References**

340

- 341 1. Horlings CG, Carpenter MG, Küng UM, Honegger F, Wiederhold B, Allum JH. Influence of  
342 virtual reality on postural stability during movements of quiet stance. *Neuroscience letters*.  
343 2009;451(3):227-31.
- 344 2. Nishiike S, Okazaki S, Watanabe H, Akizuki H, Imai T, Uno A, et al. The effect of  
345 visual-vestibulosomatosensory conflict induced by virtual reality on postural stability in humans.  
346 *The Journal of Medical Investigation*. 2013;60(3.4):236-9.
- 347 3. Chiarovano E, de Waele C, MacDougall HG, Rogers SJ, Burgess AM, Curthoys IS.  
348 Maintaining balance when looking at a virtual reality three-dimensional display of a field of  
349 moving dots or at a virtual reality scene. *Frontiers in neurology*. 2015;6.
- 350 4. Epure P, Gheorghe C, Nissen T, Toader LO, Macovei AN, Nielsen SS, et al. Effect of the  
351 Oculus Rift head mounted display on postural stability. *International Journal of Child Health  
352 and Human Development*. 2016;9(3):343.
- 353 5. Soffel F, Zank M, Kunz A, editors. Postural stability analysis in virtual reality using the

- 354 HTC vive. Proceedings of the 22nd ACM Conference on Virtual Reality Software and  
355 Technology; 2016: ACM.
- 356 6. Robert MT, Ballaz L, Lemay M. The effect of viewing a virtual environment through a  
357 head-mounted display on balance. *Gait & Posture*. 2016;48:261-6.
- 358 7. Streepey JW, Kenyon RV, Keshner EA. Field of view and base of support width influence  
359 postural responses to visual stimuli during quiet stance. *Gait & posture*. 2007;25(1):49-55.
- 360 8. Kennedy RS, Stanney KM. Postural instability induced by virtual reality exposure:  
361 Development of a certification protocol. *International Journal of Human-Computer Interaction*.  
362 1996;8(1):25-47.
- 363 9. Keshner EA, Kenyon RV, Langston J. Postural responses exhibit multisensory  
364 dependencies with discordant visual and support surface motion. *Journal of Vestibular*  
365 *Research*. 2004;14(4):307-19.
- 366 10. Horak FB. Postural orientation and equilibrium: what do we need to know about neural  
367 control of balance to prevent falls? Age and ageing. 2006;35(suppl 2):ii7-ii11.
- 368 11. Peterka R. Sensorimotor integration in human postural control. *Journal of*  
369 *neurophysiology*. 2002;88(3):1097-118.
- 370 12. Oie KS, Kiemel T, Jeka JJ. Multisensory fusion: simultaneous re-weighting of vision and  
371 touch for the control of human posture. *Cognitive Brain Research*. 2002;14(1):164-76.
- 372 13. Vuillerme N, Burdet C, Isableu B, Demetz S. The magnitude of the effect of calf muscles  
373 fatigue on postural control during bipedal quiet standing with vision depends on the eye-visual  
374 target distance. *Gait & posture*. 2006;24(2):169-72.
- 375 14. Duarte M, Zatsiorsky VM. Effects of body lean and visual information on the equilibrium



- 376 maintenance during stance. *Experimental brain research*. 2002;146(1):60-9.
- 377 15. Vuillerme N, Pinsault N, Vaillant J. Postural control during quiet standing following  
378 cervical muscular fatigue: effects of changes in sensory inputs. *Neuroscience letters*.  
379 2005;378(3):135-9.
- 380 16. Wei K, Stevenson IH, Körding KP. The uncertainty associated with visual flow fields and  
381 their influence on postural sway: Weber's law suffices to explain the nonlinearity of vection.  
382 *Journal of vision*. 2010;10(14):4-.
- 383 17. Grillon C, Baas JM, Cornwell B, Johnson L. Context conditioning and behavioral  
384 avoidance in a virtual reality environment: effect of predictability. *Biological psychiatry*.  
385 2006;60(7):752-9.
- 386 18. Hamm AO, Cuthbert BN, Globisch J, Vaitl D. Fear and the startle reflex: Blink modulation  
387 and autonomic response patterns in animal and mutilation fearful subjects. *Psychophysiology*.  
388 1997;34(1):97-107.
- 389 19. Marsh AA, Ambady N, Kleck RE. The effects of fear and anger facial expressions on  
390 approach-and avoidance-related behaviors. *Emotion*. 2005;5(1):119.
- 391 20. Smetanin B, Popov K, Kozhina G. Specific and nonspecific visual influences on the  
392 stability of the vertical posture in humans. *Neurophysiology*. 2004;36(1):58-64.
- 393 21. Bardy BG, Warren WH, Kay BA. The role of central and peripheral vision in postural  
394 control during walking. *Perception & psychophysics*. 1999;61(7):1356-68.
- 395
